# Supplementary material for: COVID-19 Lockdown and Social Capital Changes Among Youths in China
Source: PubMed Central journal article supplement (PMC9808357; doi:10.34172/ijhpm.2021.17), 2021-03-16
Supplement: ijhpm-11-1301-s001.pdf [file ijhpm-11-1301-s001.pdf]

**Article title:** COVID-19 Lockdown and Social Capital Changes Among Youths in China

**Journal name:** International Journal of Health Policy and Management (IJHPM)

**Authors' information:** Miyang Luo<sup>1,2¶</sup>, Dong Zhang<sup>3¶</sup>, Pengyue Shen<sup>4</sup>, Yun Yin<sup>4</sup>, Shujuan Yang<sup>4,2\*</sup>, Peng Jia<sup>5,2\*</sup>

<sup>1</sup>Xiangya School of Public Health, Central South University, Changsha, China.

<sup>2</sup>International Institute of Spatial Lifecourse Epidemiology (ISLE), Hong Kong, China.

<sup>3</sup>Department of Family and Preventive Medicine, College of Medicine, University of Arkansas for Medical Sciences, Little Rock, AR, USA.

<sup>4</sup>West China School of Public Health and West China Fourth Hospital, Sichuan University, Chengdu, China.

<sup>5</sup>Department of Land Surveying and Geo-Informatics, The Hong Kong Polytechnic University, Hong Kong, China.

(\*corresponding authors: [rekiny@126.com](mailto:rekiny@126.com) & [jiapengff@hotmail.com](mailto:jiapengff@hotmail.com))

¶ Both authors contributed equally to this paper.

### Supplementary file 1

**Table S1.** Participating youths' approval for items of the social capital before COVID-19 before and during lockdown

| Variables                                                                    | Grand total<br>(n=10,540) | High/Vocational<br>school students<br>(n=2,855) | Undergraduate<br>students<br>(n=7,419) | Graduate<br>students<br>(n=266) |
|------------------------------------------------------------------------------|---------------------------|-------------------------------------------------|----------------------------------------|---------------------------------|
| <b>Individual social capital scale (% , agree/strongly agree)</b>            |                           |                                                 |                                        |                                 |
| Q1                                                                           |                           |                                                 |                                        |                                 |
| You have many close contacts                                                 |                           |                                                 |                                        |                                 |
| Pre-COVID-19                                                                 | 7.3                       | 4.3                                             | 8.2                                    | 11.7                            |
| Lockdown                                                                     | 1.4                       | 0.8                                             | 1.6                                    | 3.0                             |
| Q2                                                                           |                           |                                                 |                                        |                                 |
| You have many social interactions with people other than your family members |                           |                                                 |                                        |                                 |
| Pre-COVID-19                                                                 | 8.6                       | 5.5                                             | 9.4                                    | 16.9                            |

|                                                                  |                                                                                                |      |      |      |      |
|------------------------------------------------------------------|------------------------------------------------------------------------------------------------|------|------|------|------|
|                                                                  | Lockdown                                                                                       | 3.9  | 2.4  | 4.6  | 3.4  |
| Q3                                                               | You always trust people who have social interaction with you                                   |      |      |      |      |
|                                                                  | Pre-COVID-19                                                                                   | 60.4 | 49.9 | 64.1 | 70.3 |
|                                                                  | Lockdown                                                                                       | 54.5 | 42.7 | 58.6 | 65.8 |
| Q4                                                               | You always receive emotional/financial/instrumental support from friends/classmates            |      |      |      |      |
|                                                                  | Pre-COVID-19                                                                                   | 54.6 | 43.5 | 57.8 | 66.5 |
|                                                                  | Lockdown                                                                                       | 53.8 | 42.8 | 57.5 | 65.8 |
| Q5                                                               | You have a good relationship with your classmates                                              |      |      |      |      |
|                                                                  | Pre-COVID-19                                                                                   | 71.8 | 61.4 | 75.5 | 80.5 |
|                                                                  | Lockdown                                                                                       | 68.9 | 57.9 | 72.8 | 77.8 |
| <b>Family social capital scale (% , agree/strongly agree)</b>    |                                                                                                |      |      |      |      |
| Q6                                                               | You live with family members                                                                   |      |      |      |      |
|                                                                  | Pre-COVID-19                                                                                   | 74.1 | 87.6 | 70.1 | 38.7 |
|                                                                  | Lockdown                                                                                       | 93.9 | 94.3 | 93.9 | 90.6 |
| Q7                                                               | You have a good relationship with your family (mainly including parents, brothers and sisters) |      |      |      |      |
|                                                                  | Pre-COVID-19                                                                                   | 81.6 | 75.9 | 83.5 | 87.6 |
|                                                                  | Lockdown                                                                                       | 80.0 | 75.1 | 81.7 | 86.1 |
| Q8                                                               | You always receive emotional/financial/instrumental support from family members                |      |      |      |      |
|                                                                  | Pre-COVID-19                                                                                   | 73.5 | 64.2 | 76.9 | 79.0 |
|                                                                  | Lockdown                                                                                       | 74.7 | 65.5 | 77.9 | 84.6 |
| <b>Community social capital scale (% , agree/strongly agree)</b> |                                                                                                |      |      |      |      |
| Q9                                                               | You frequently participate in activities organized by community organizations                  |      |      |      |      |
|                                                                  | Pre-COVID-19                                                                                   | 13.8 | 4.7  | 17.5 | 9.0  |

|                                                                |                                                                                               |      |       |      |       |
|----------------------------------------------------------------|-----------------------------------------------------------------------------------------------|------|-------|------|-------|
|                                                                | Lockdown                                                                                      | 7.2  | 2.7   | 9.0  | 8.3   |
| Q10                                                            | You always receive support from community organizations                                       |      |       |      |       |
|                                                                | Pre-COVID-19                                                                                  | 8.4  | 4.7   | 9.9  | 6.4   |
|                                                                | Lockdown                                                                                      | 7.6  | 4.3   | 8.9  | 6.4   |
| Q11                                                            | You always receive emotional/financial/instrumental support from your teachers or instructors |      |       |      |       |
|                                                                | Pre-COVID-19                                                                                  | 26.0 | 20.9  | 27.8 | 30.8  |
|                                                                | Lockdown                                                                                      | 30.4 | 22.7  | 33.1 | 36.8  |
| Q12                                                            | You are very concerned about what happens in the same community/dormitory building            |      |       |      |       |
|                                                                | Pre-COVID-19                                                                                  | 36.5 | 33.7  | 37.3 | 45.1  |
|                                                                | Lockdown                                                                                      | 45.2 | 37.6  | 47.5 | 62.0  |
| Q13                                                            | You agree that people who live in the same community/dormitory can be trusted                 |      |       |      |       |
|                                                                | Pre-COVID-19                                                                                  | 24.2 | 25.7  | 31.6 | 25.4  |
|                                                                | Lockdown                                                                                      | 22.9 | 24.7  | 32.0 | 24.4  |
| <b>Society social capital scale (% , agree/strongly agree)</b> |                                                                                               |      |       |      |       |
| Q14                                                            | You trust other health organizations/governmental organizations very much                     |      |       |      |       |
|                                                                | Pre-COVID-19                                                                                  | 57.7 | 64.7  | 55.1 | 56.8  |
|                                                                | Lockdown                                                                                      | 60.8 | 67.25 | 58.3 | 59.8  |
| Q15                                                            | Do you agree with the statement that talented people will be recognized by the society        |      |       |      |       |
|                                                                | Pre-COVID-19                                                                                  | 46.9 | 46.4  | 46.8 | 54.5  |
|                                                                | Lockdown                                                                                      | 48.8 | 48.1  | 48.9 | 52.63 |
